# Supplementary material
Source: publisher figshare collection journal article supplement (https://geolsoc.figshare.com/ndownloader/files/5426513)
Supplement: Supplementary file 1 [file 5426513]

Table 1	GPS coordinates of analyzed samples
Sample	RA 4	RA 6	RA 10	IR24	RA 31	RA 32	RA 37	RA 52	RA 53
Lithology	gabbro	serpentinite	gabbro	eclogite	serpentinite	eclogite	wherlite	grt-amphibolite	gabbro
latitude	N 37°23'24''	N 37°26'47''	N 37°26'52''	N 37°22'43''	N 37°22'55''	N 37°23'43''	N 37°23'45''	N 37°39'41''	N 37°39'32''
longitude	E 49°01'51''	E 48°48'46''	E 48°48'33''	E 48°58'17''	E 48°58'23''	E 48°59'33''	E 49°03'56''	E 48°52'23''	E 48°56'49''
